# Supplementary material
Source: PubMed Central journal article supplement (PMC3318136)
Supplement: mmc1.pdf [file mmc1.pdf]

# **Highly Perturbed pKa Values in the Unfolded State of Hen Egg White Lysozyme**

John Bradley, Fergal O'Meara, Damien Farrell, and Jens Erik Nielsen

School of Biomolecular and Biomedical Science, Centre for Synthesis and Chemical Biology, University College Dublin Conway Institute, University College Dublin, Dublin, Ireland

## Supplementary material

**Figure 1**

CD-wavelength scans of wild type Hen Egg White Lysozyme before and after two thermal denaturation runs (10-95°C) in a 50mM Britton-Robinson buffer as described in Materials and Methods.

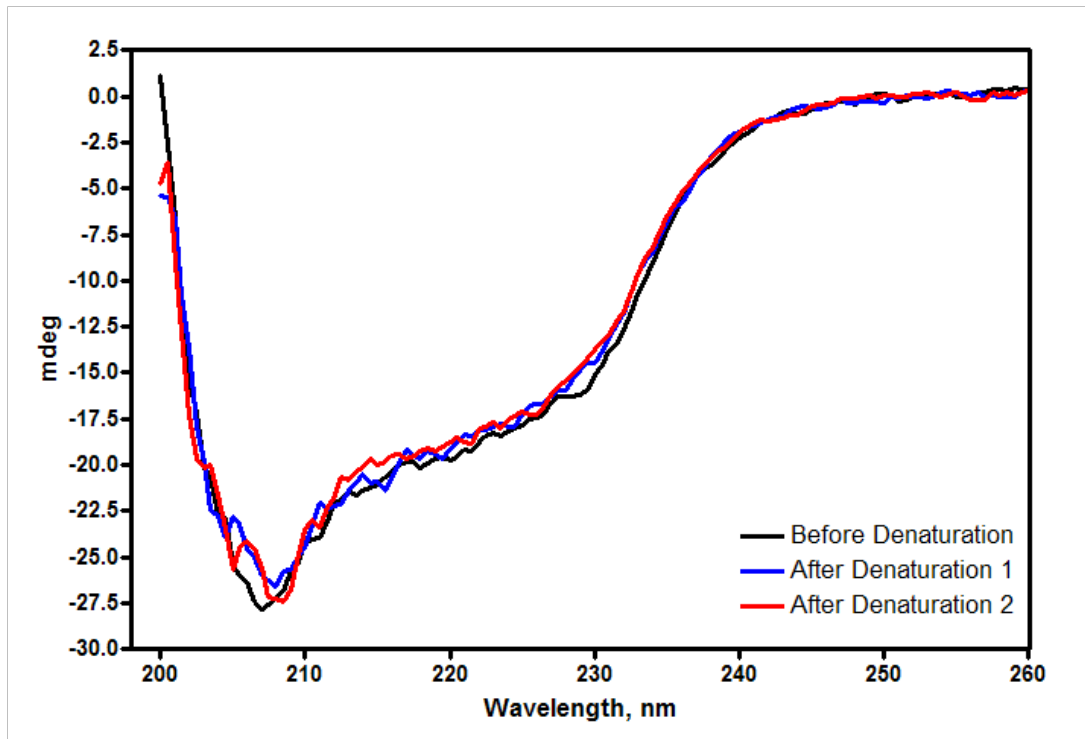

**Figure 2**

Fits of the differential pH-stability profiles for the eight mutants of HEWL.

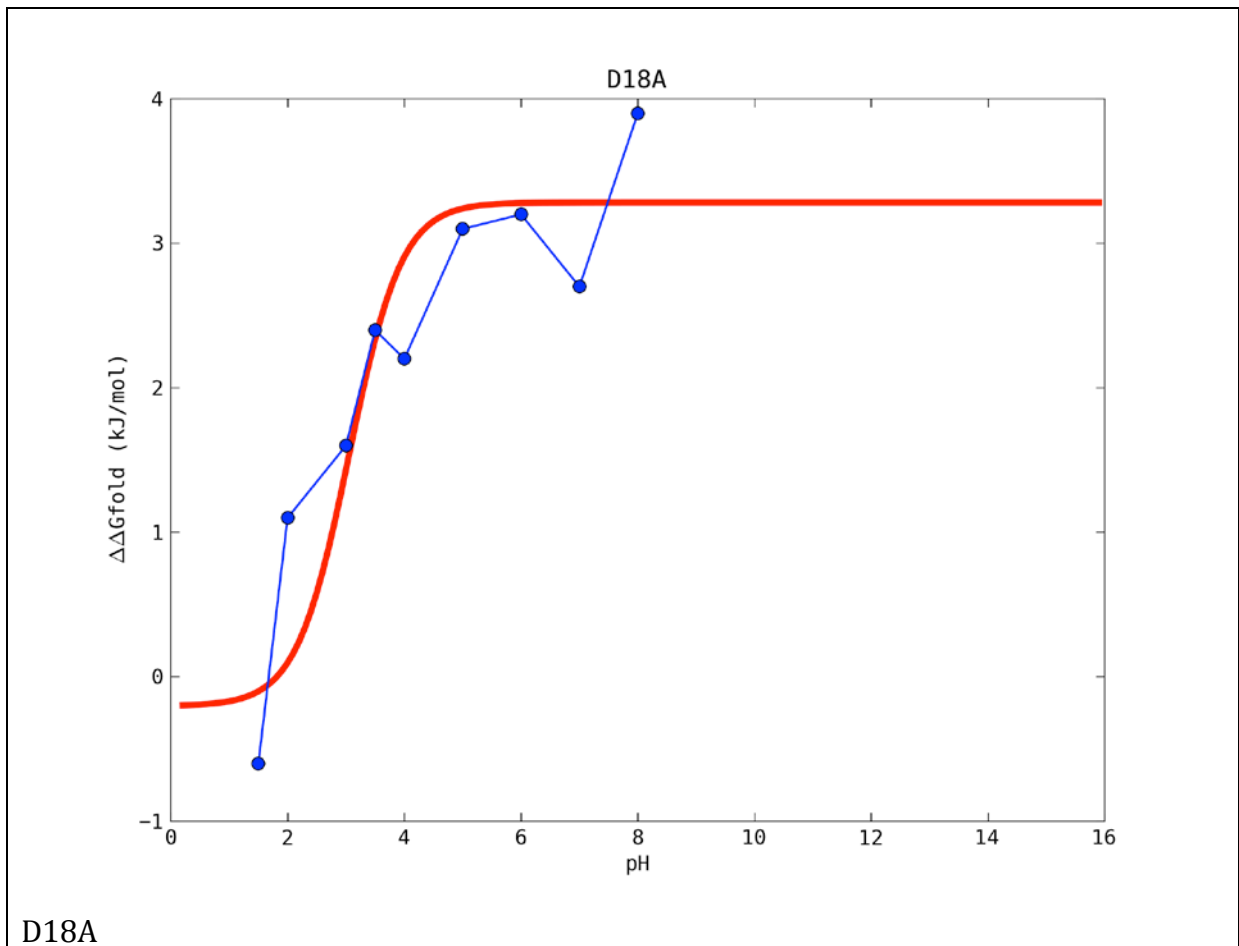

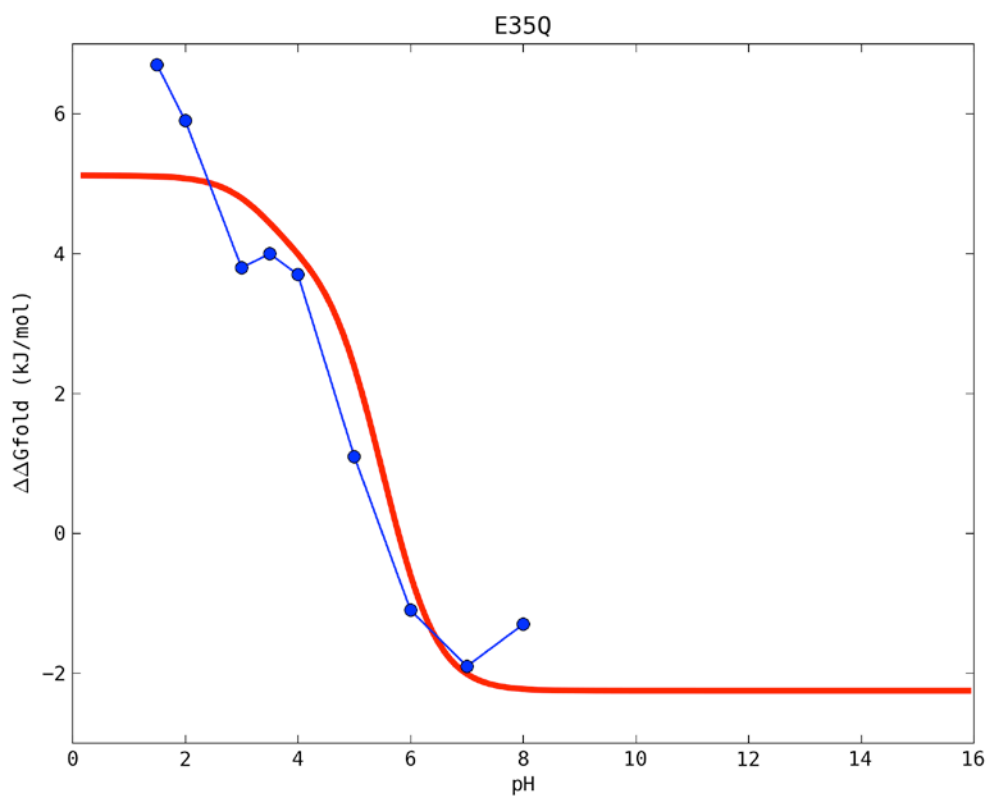

E35Q

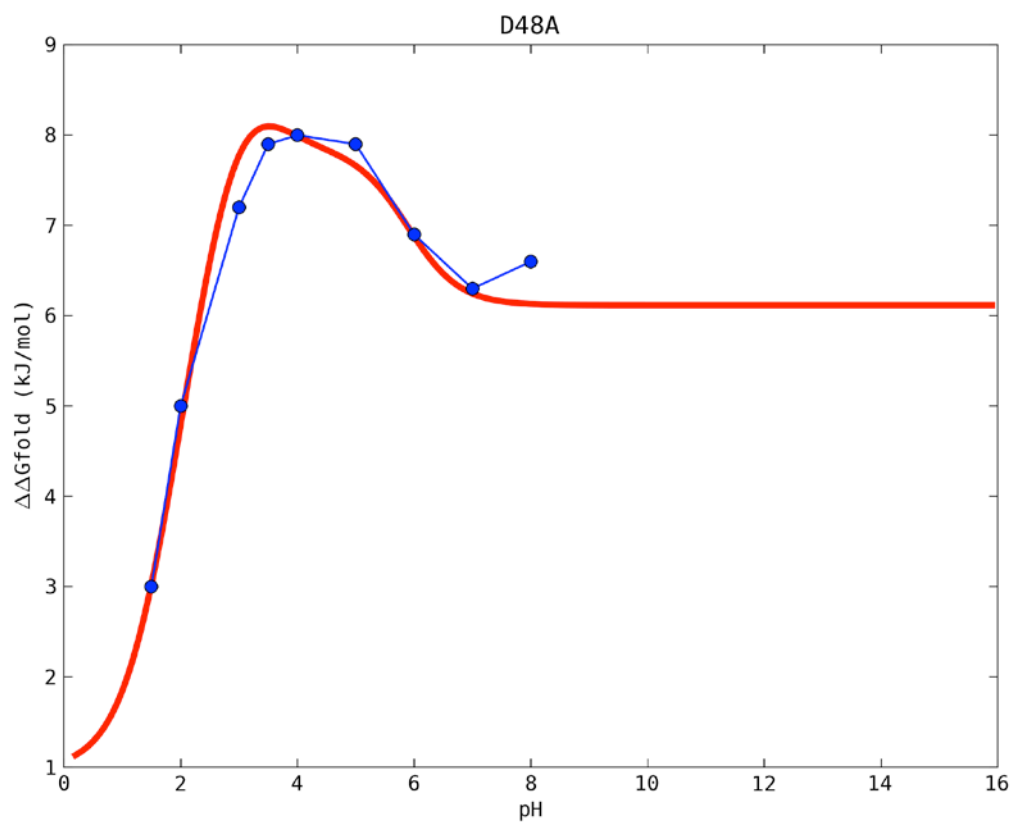

D48A

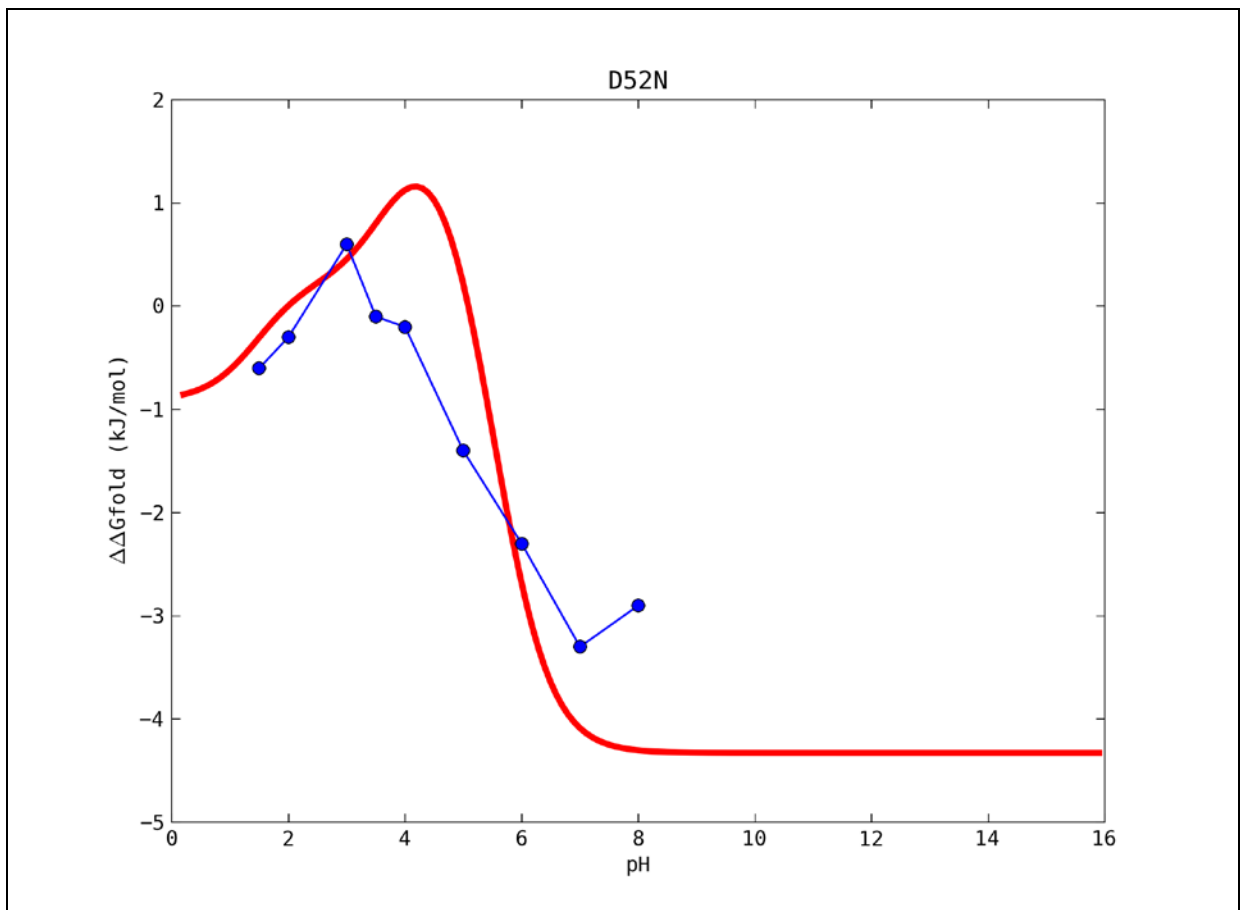

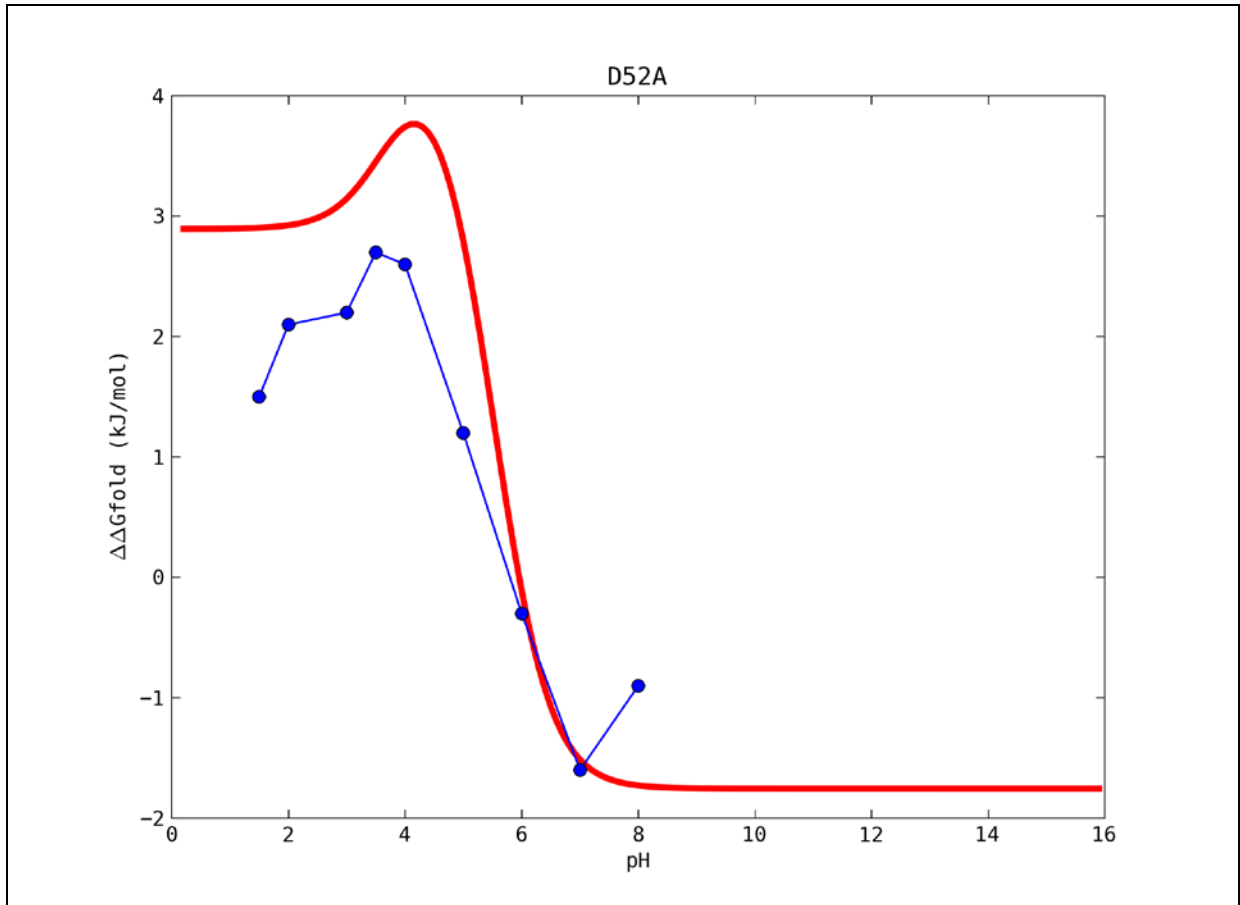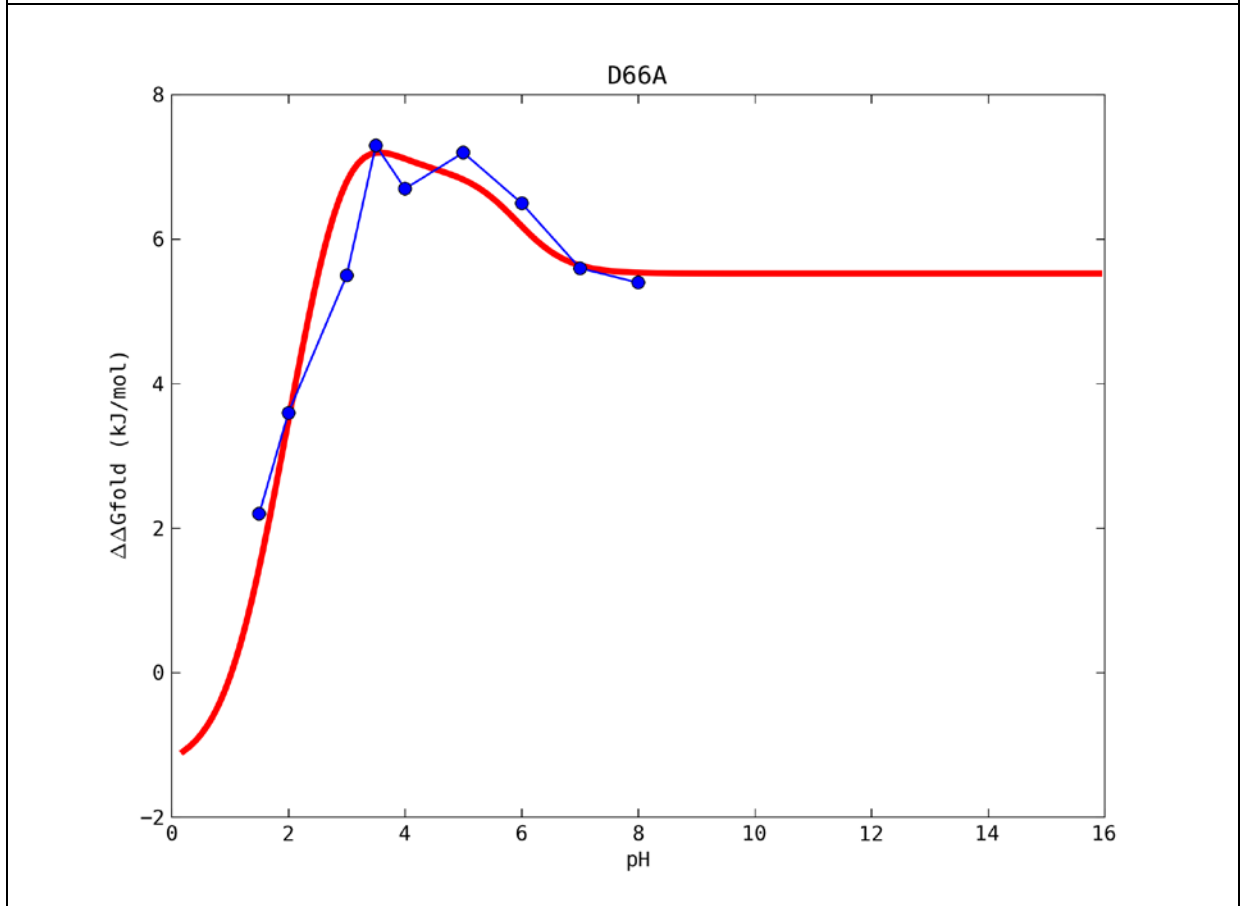

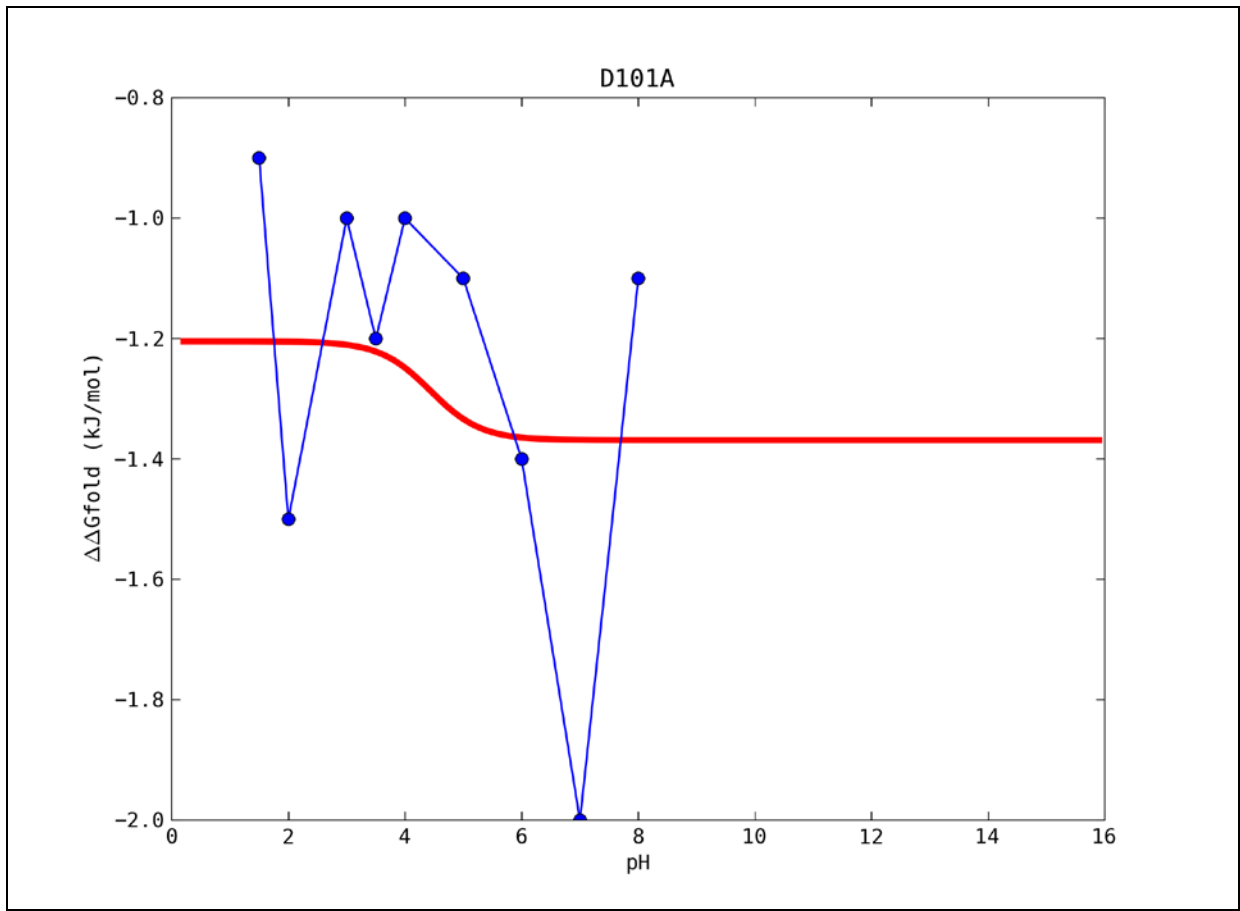

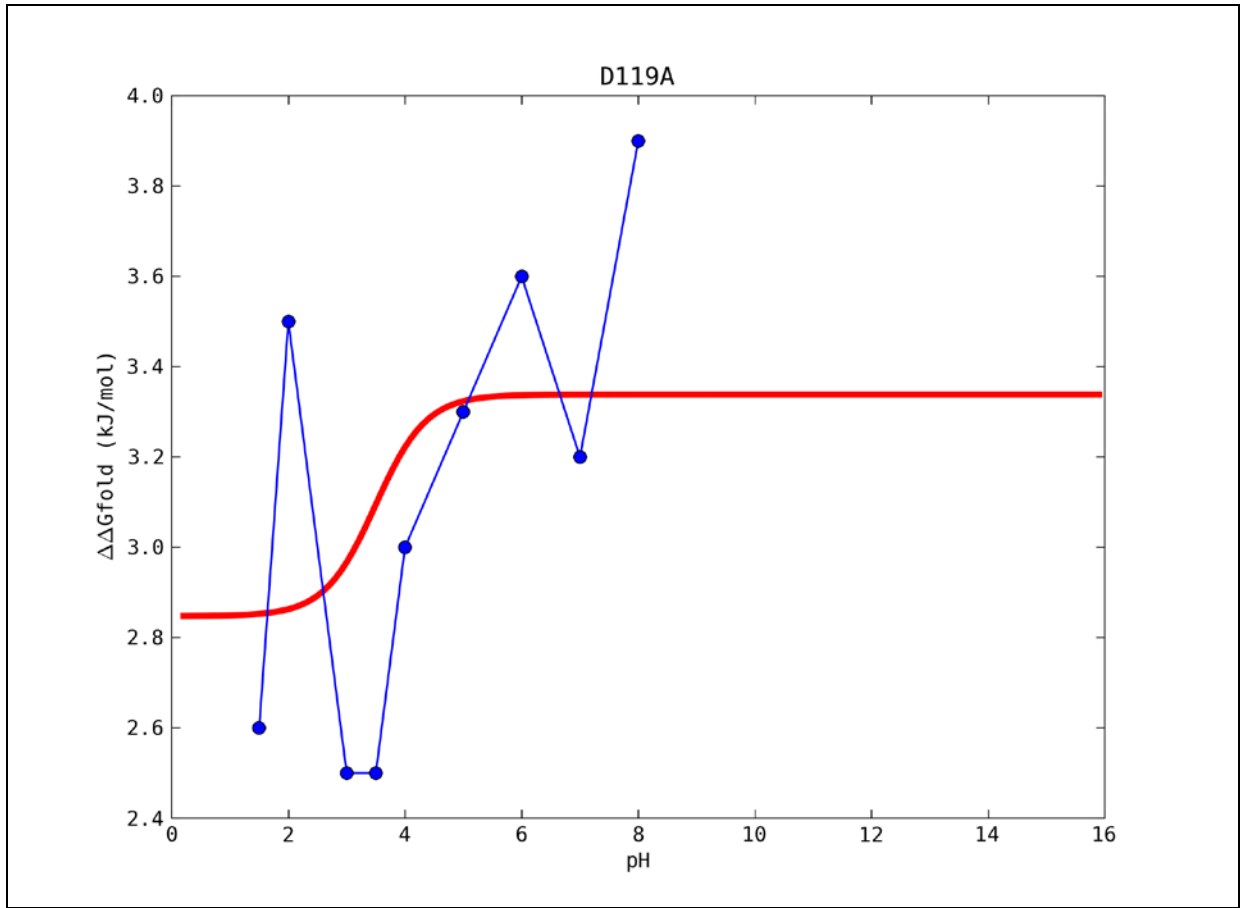



**Figure SI3**

Fit of the global HEWL pH-stability profile using the  $pK_{a,U}$  values determined using mutant data, and  $pK_a$  values for Glu7, Asp87, C-terminus, N-terminus and a lysine determined using the progressive fitting strategy.

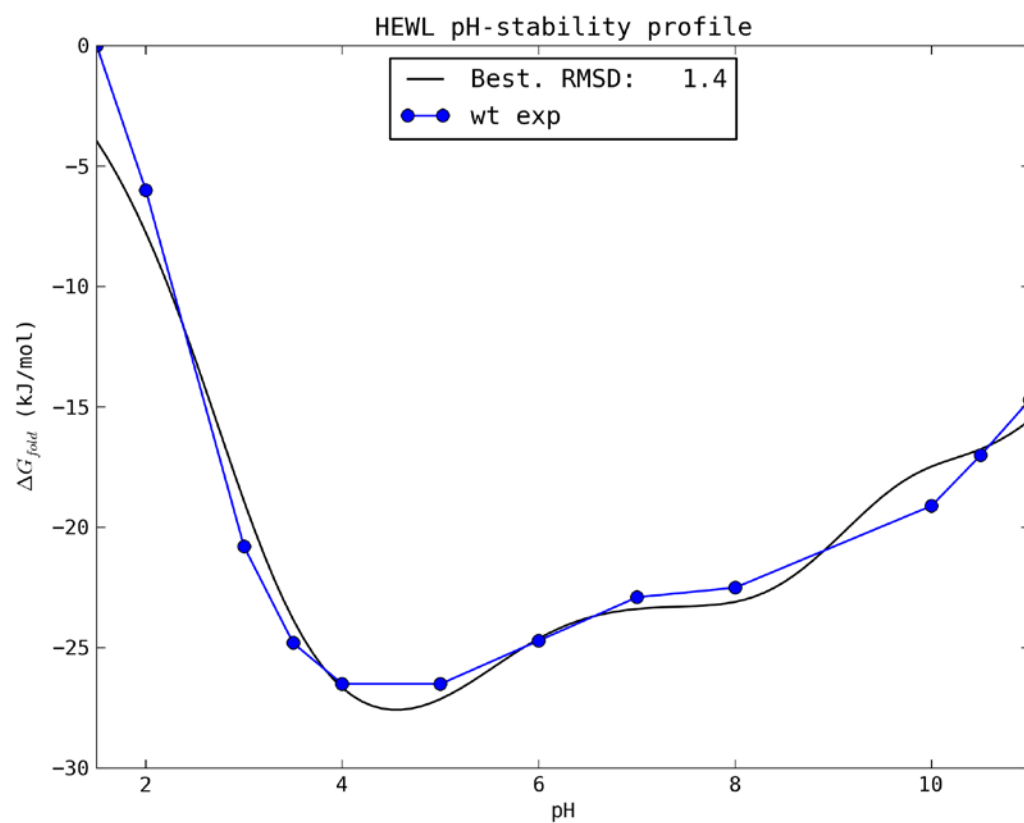

### Figure S14

Hen Egg White Lysozyme (PDB ID 2LZT) with all acidic groups and His 15 indicated.  
Figure produced with Yasara (<http://www.yasara.org>).

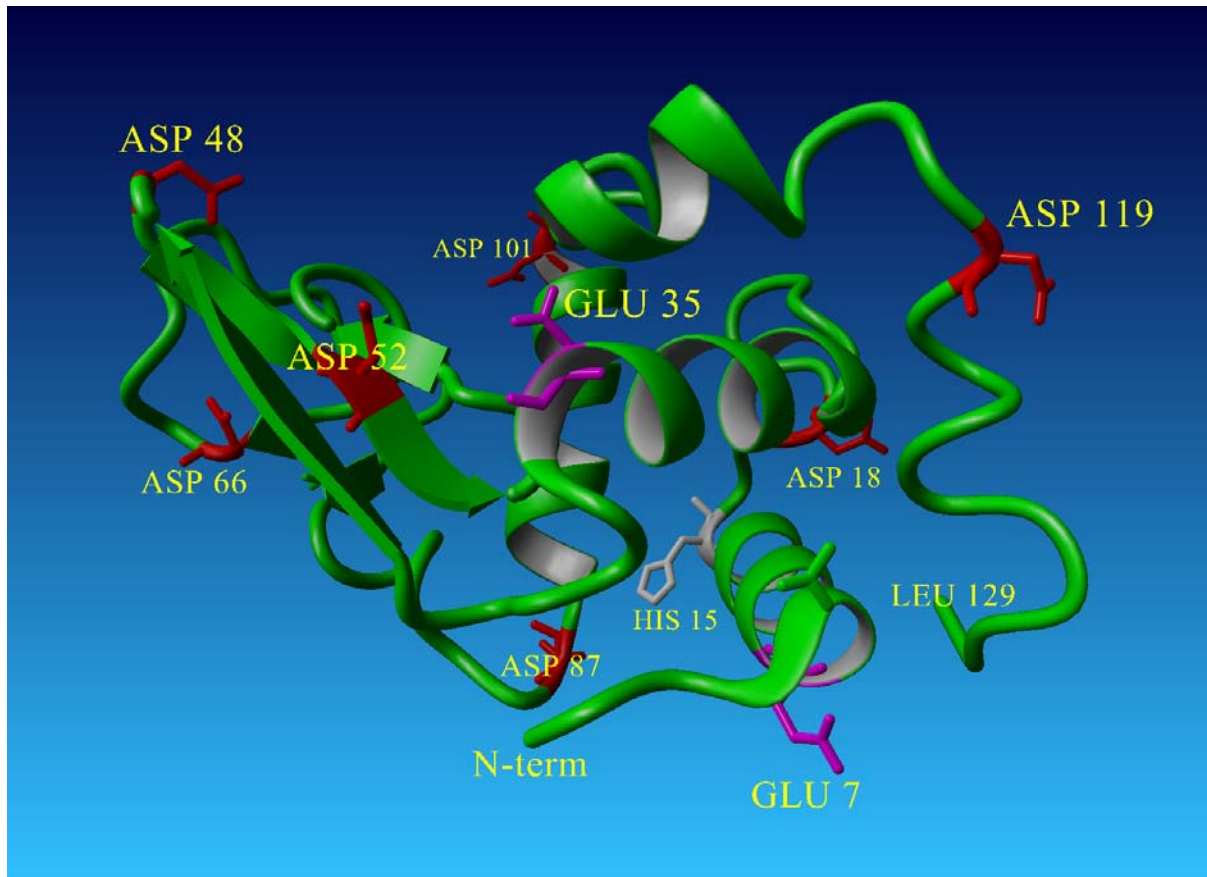

Table SI1

$\Delta S^{\circ}_m$  values (in J/mol/K) found by Van't Hoff analysis.

| pH    | WT   | D18A | E35Q | D48A | D52A | D52N | D66A | D101A | D119A |
|-------|------|------|------|------|------|------|------|-------|-------|
| 1.50  | 0.84 | 0.76 | 0.79 | 0.67 | 0.79 | 0.90 | 0.82 | 0.88  | 0.73  |
| 2.00  | 0.94 | 0.77 | 1.51 | 0.73 | 0.94 | 1.08 | 1.00 | 1.05  | 0.85  |
| 3.00  | 1.15 | 0.97 | 1.62 | 0.79 | 1.09 | 1.07 | 1.15 | 1.12  | 1.03  |
| 3.50  | 1.25 | 1.05 | 1.79 | 0.85 | 1.24 | 0.98 | 1.19 | 1.16  | 1.01  |
| 4.00  | 1.12 | 0.97 | 0.89 | 0.93 | 1.18 | 1.03 | 1.23 | 1.13  | 1.07  |
| 5.00  | 1.17 | 0.97 | 1.18 | 0.92 | 1.20 | 1.04 | 1.15 | 1.34  | 1.09  |
| 6.00  | 1.26 | 1.05 | 1.18 | 0.90 | 1.26 | 1.34 | 1.08 | 1.28  | 1.20  |
| 7.00  | 1.25 | 1.07 | 1.17 | 0.89 | 1.23 | 1.24 | 1.05 | 1.25  | 1.18  |
| 8.00  | 1.21 | 1.13 | 1.32 | 1.01 | 1.35 | 1.26 | 1.23 | 1.29  | 1.23  |
| 9.00  | 0.68 | 0.63 | 1.25 | 1.00 | 0.84 | 0.91 | 0.69 | 0.67  | 0.64  |
| 10.00 | 1.43 | 1.32 | 1.41 | 1.07 | 1.66 | 1.38 | 1.31 | 1.61  | 1.20  |
| 10.50 | 1.52 | 1.58 | 1.38 | 1.13 | 1.71 | 1.75 | 1.27 | 1.76  | 1.33  |
| 11.00 | 1.52 | 1.64 | 0.63 | 1.09 | 1.82 | 1.65 | 1.18 | 2.03  | 1.54  |

**Table SI2**

$\Delta H^\circ$  values (in kJ/mol) found by Van't Hoff analysis.

| pH   | WT    | D18A  | E35Q  | D48A  | D52A  | D52N  | D66A  | D101A | D119A |
|------|-------|-------|-------|-------|-------|-------|-------|-------|-------|
| 1.5  | 266.4 | 242.3 | 246.1 | 210.3 | 251.1 | 285.9 | 257.3 | 319   | 314.6 |
| 2    | 3.4.5 | 249   | 517.8 | 233.1 | 303.3 | 350.4 | 320.8 | 326.7 | 321.4 |
| 3    | 395.3 | 331.3 | 549.3 | 264.4 | 369.4 | 364.6 | 385.5 | 343.8 | 339.6 |
| 3.5  | 433.2 | 362.7 | 602.3 | 286.6 | 426.5 | 339.3 | 403.8 | 402.9 | 344.3 |
| 4    | 391.4 | 337.8 | 284.1 | 317.4 | 407.7 | 359.5 | 418.1 | 396.5 | 345.8 |
| 5    | 407.8 | 334.5 | 397.8 | 312.2 | 419   | 365.4 | 391.6 | 468.5 | 345.4 |
| 6    | 437.2 | 360.5 | 400.9 | 304.1 | 437   | 467.3 | 367.5 | 446.9 | 343   |
| 7    | 431.2 | 365.6 | 403.9 | 298.8 | 425.4 | 431.8 | 354   | 435.2 | 341.2 |
| 8    | 416.6 | 384   | 460.1 | 340.3 | 467.7 | 439.4 | 416   | 444.7 | 340   |
| 9    | 237   | 216   | 433.9 | 333.7 | 293   | 316.5 | 234.2 | 235.2 | 343.3 |
| 10   | 487.5 | 447.3 | 489.3 | 358.5 | 567.6 | 471.5 | 438.9 | 552.9 | 334.6 |
| 10.5 | 513.5 | 531.8 | 478.4 | 379   | 577.9 | 597.4 | 422.7 | 600.7 | 332.3 |
| 11   | 508.3 | 547.6 | 218.9 | 363.9 | 614.2 | 555   | 389.6 | 686.4 | 328.7 |

**Table SI3**

$T_m$  values in Kelvin obtained from the Van't Hoff analysis.

| pH    | $T_m$ WT | $T_m$ D18A | $T_m$ E35Q | $T_m$ D48A | $T_m$ D52A | $T_m$ D52N | $T_m$ D66A | $T_m$ D101A | $T_m$ D119A |
|-------|----------|------------|------------|------------|------------|------------|------------|-------------|-------------|
| 1.50  | 317.8    | 318.50     | 309.80     | 314.20     | 316.20     | 318.60     | 315.20     | 319.00      | 314.60      |
| 2.00  | 324.9    | 323.60     | 317.90     | 319.10     | 322.50     | 325.30     | 320.70     | 326.70      | 321.40      |
| 3.00  | 342.5    | 340.60     | 338.00     | 334.10     | 339.90     | 341.80     | 335.90     | 343.80      | 339.60      |
| 3.50  | 347.3    | 344.50     | 342.60     | 338.00     | 344.10     | 347.40     | 338.50     | 348.60      | 344.30      |
| 4.00  | 349.3    | 346.70     | 345.00     | 339.80     | 346.30     | 349.60     | 341.40     | 350.50      | 345.80      |
| 5.00  | 349.2    | 345.60     | 348.00     | 340.00     | 347.90     | 351.00     | 340.80     | 350.70      | 345.40      |
| 6.00  | 347.2    | 343.30     | 348.50     | 339.00     | 347.60     | 350.20     | 339.60     | 348.90      | 343.00      |
| 7.00  | 345.1    | 341.90     | 347.30     | 337.60     | 347.00     | 349.10     | 338.40     | 347.50      | 341.20      |
| 8.00  | 344.6    | 340.10     | 346.10     | 336.70     | 345.70     | 347.80     | 338.10     | 345.90      | 340.00      |
| 9.00  | 346.7    | 344.50     | 349.60     | 334.80     | 348.40     | 348.00     | 341.80     | 350.30      | 343.30      |
| 10.00 | 340.5    | 338.10     | 341.70     | 336.30     | 341.00     | 342.70     | 334.50     | 343.20      | 334.60      |
| 10.50 | 338.0    | 335.90     | 339.30     | 334.20     | 338.60     | 341.10     | 332.40     | 340.70      | 332.30      |
| 11.00 | 335.3    | 333.40     | 337.30     | 332.50     | 336.80     | 336.90     | 330.60     | 338.80      | 328.70      |

**Table SI4**

| <b>Mutant/<math>\Delta S^{\circ}_m</math><br/>(J/mol/K)</b> | <b>pKa, U</b> |             |                                |                                |                                |
|-------------------------------------------------------------|---------------|-------------|--------------------------------|--------------------------------|--------------------------------|
|                                                             | <b>0.84</b>   | <b>1.15</b> | <b>1.15<math>\pm</math>10%</b> | <b>1.15<math>\pm</math>20%</b> | <b>1.15<math>\pm</math>30%</b> |
| <b>D18A</b>                                                 | 3.4 (0.2)     | 3.4 (0.2)   | 3.4 (0.2)                      | 3.3 (0.1)                      | 3.1 (0.1)                      |
| <b>E35Q</b>                                                 | 5.0 (0.2)     | 4.4 (0.2)   | 4.4 (0.3)                      | 4.5 (0.2)                      | 4.6 (0.4)                      |
| <b>D48A</b>                                                 | 2.9 (0.3)     | 2.0 (1.9)   | 2.2 (0.3)                      | 2.2 (0.3)                      | 1.5 (3.1)                      |
| <b>D52A</b>                                                 | 4.0 (0.2)     | 3.0 (0.3)   | 3.0 (0.2)                      | 3.0 (0.2)                      | 3.2 (0.2)                      |
| <b>D52N</b>                                                 | 4.1 (0.2)     | 3.1 (0.2)   | 3.1 (0.2)                      | 3.2 (0.3)                      | 3.2 (0.4)                      |
| <b>D66A</b>                                                 | 3.1 (0.1)     | 2.4 (0.3)   | 2.5 (0.4)                      | 2.5 (0.3)                      | 2.2 (0.4)                      |
| <b>D101A</b>                                                | 4.4 (0.2)     | 4.3 (0.3)   | 4.3 (0.2)                      | 4.3 (0.2)                      | 4.3 (0.2)                      |
| <b>D119A</b>                                                | 3.6 (0.2)     | 3.9 (0.3)   | 3.9 (0.2)                      | 3.7 (0.3)                      | 3.8 (0.3)                      |

The effect of using a different  $\Delta S^{\circ}_m$  for calculating  $\Delta\Delta G^{\circ}$  values from  $\Delta T_m$  on the fitted pKa,U values. The value of  $\Delta S^{\circ}_m$  used for the main results is that of the wild type at pH 1.5 (0.84 J/mol/K), and is showed in the first column. In the following columns the average value of  $\Delta S^{\circ}_m$  across all mutants and pH values (1.15 J/mol/K) is used with an increasing amount of random Gaussian noise added. It is seen that although the use of a different  $\Delta S^{\circ}_m$  value does produce different pKa, U values, the effect is moderate for D18, E35, D101 and D119, whereas the effect for D48, D52 and D66 is to predict even more highly shifted pKa,U values.
